# Supplementary material for: Growth hormone receptor regulates β cell hyperplasia and glucose-stimulated insulin secretion in obese mice
Source: JCI journal article supplement (doi:10.1172/jci45027), 2011-05-09
Supplement: sd1 [file 1]

301 Moved Permanently

# Moved Permanently

The document has moved here.
